# Supplementary material for: Synthesis and Photophysical Study of 2′-Deoxyuridines Labeled with Fluorene Derivatives
Source: Molecules. 2012 Oct 15;17(10):12061–71. doi: 10.3390/molecules171012061 (PMC6268453; doi:10.3390/molecules171012061)

**Table S1.** Photophysical characteristics of nucleosides in water/1,4-dioxane binary solvent mixture.

| Compound               | Fraction water in 1,4-dioxane | $E_T(30)$ <sup>a</sup> | $\lambda_{\max}$ (nm) <sup>b</sup> | $\lambda_{\text{em}}$ (nm) <sup>c</sup> | Stokes shift (cm <sup>-1</sup> ) |
|------------------------|-------------------------------|------------------------|------------------------------------|-----------------------------------------|----------------------------------|
| <b>U<sup>FL</sup></b>  | 0                             | 36.4                   | 373                                | 434                                     | 3768                             |
|                        | 6.00E-04                      | 36.6                   | 373                                | 434                                     | 3768                             |
|                        | 0.003                         | 37.3                   | 373                                | 434                                     | 3768                             |
|                        | 0.015                         | 39.9                   | 373                                | 434                                     | 3768                             |
|                        | 0.042                         | 43.4                   | 373                                | 434                                     | 3768                             |
|                        | 0.06                          | 44.7                   | 373                                | 434                                     | 3768                             |
|                        | 0.12                          | 46.8                   | 373                                | 435                                     | 3821                             |
|                        | 0.21                          | 48.6                   | 374                                | 436                                     | 3802                             |
|                        | 0.42                          | 52.1                   | 374                                | 444                                     | 4215                             |
|                        | 0.6                           | 54.9                   | 383                                | 454                                     | 4083                             |
| <b>U<sup>FO</sup></b>  | 0                             | 36.4                   | 344                                | 516                                     | 9690                             |
|                        | 6.00E-04                      | 36.6                   | 345                                | 519                                     | 9718                             |
|                        | 0.003                         | 37.3                   | 346                                | 518                                     | 9597                             |
|                        | 0.015                         | 39.9                   | 346                                | 529                                     | 9998                             |
|                        | 0.042                         | 43.4                   | 345                                | 535                                     | 10294                            |
|                        | 0.06                          | 44.7                   | 346                                | 543                                     | 10486                            |
|                        | 0.12                          | 46.8                   | 345                                | 546                                     | 10670                            |
|                        | 0.21                          | 48.6                   | 346                                | 544                                     | 10519                            |
|                        | 0.42                          | 52.1                   | 343                                | 553                                     | 11071                            |
|                        | 0.6                           | 54.9                   | 344                                | 551                                     | 10921                            |
| <b>U<sup>DBF</sup></b> | 0                             | 36.4                   | 328                                | 384                                     | 4446                             |
|                        | 6.00E-04                      | 36.6                   | 328                                | 384                                     | 4446                             |
|                        | 0.003                         | 37.3                   | 328                                | 384                                     | 4446                             |
|                        | 0.015                         | 39.9                   | 328                                | 385                                     | 4514                             |
|                        | 0.042                         | 43.4                   | 328                                | 386                                     | 4581                             |
|                        | 0.06                          | 44.7                   | 329                                | 386                                     | 4488                             |
|                        | 0.12                          | 46.8                   | 328                                | 388                                     | 4715                             |
|                        | 0.21                          | 48.6                   | 329                                | 389                                     | 4688                             |
|                        | 0.42                          | 52.1                   | 328                                | 399                                     | 5425                             |
|                        | 0.6                           | 54.9                   | 328                                | 414                                     | 6333                             |
| <b>U<sup>DBT</sup></b> | 0                             | 36.4                   | 327                                | 383                                     | 4471                             |
|                        | 6.00E-04                      | 36.6                   | 327                                | 383                                     | 4471                             |
|                        | 0.003                         | 37.3                   | 327                                | 383                                     | 4471                             |
|                        | 0.015                         | 39.9                   | 327                                | 383                                     | 4471                             |
|                        | 0.042                         | 43.4                   | 327                                | 383                                     | 4471                             |
|                        | 0.06                          | 44.7                   | 327                                | 385                                     | 4607                             |
|                        | 0.12                          | 46.8                   | 327                                | 387                                     | 4741                             |
|                        | 0.21                          | 48.6                   | 327                                | 389                                     | 4874                             |
|                        | 0.42                          | 52.1                   | 327                                | 397                                     | 5392                             |
|                        | 0.6                           | 54.9                   | 327                                | 412                                     | 6309                             |

<sup>a</sup>  $E_T(30)$  values are taken from [Sinkeldam, R. W.; Tor, Y. *Org. Biomol. Chem.* **2007**, 5, 2523–2528];<sup>b</sup> Only the largest absorption maxima are listed; <sup>c</sup> Wavelength of emission maximum when excited at the absorption maximum.

**Figure S1.**  $^1\text{H}$ -NMR spectra of (a)  $\text{U}^{\text{DBF}}$  and (b)  $\text{U}^{\text{DBT}}$ .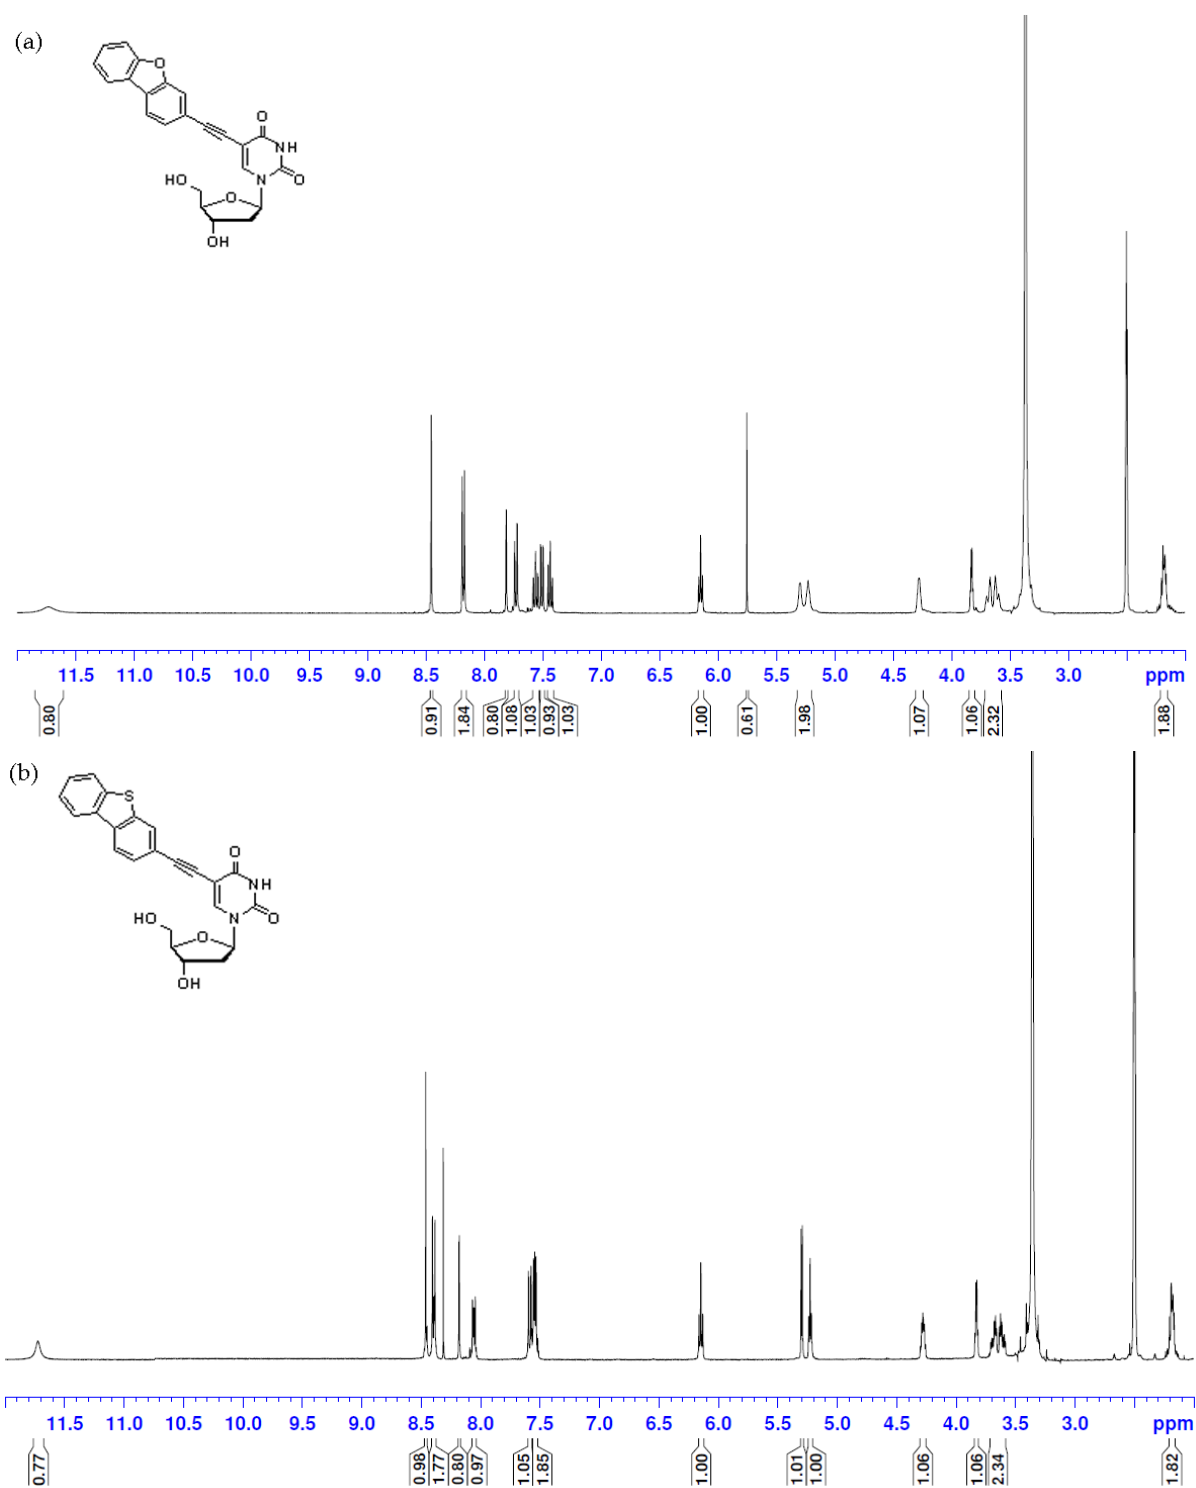

Supplement: Supplementary file 1 [file molecules-17-12061-s001.pdf]
